# Supplementary material for: The Sequential Organ Failure Assessment (SOFA) Score: has the time come for an update?
Source: PubMed Central journal article supplement (PMC9837980; doi:10.1186/s13054-022-04290-9), 2023-01-13
Supplement: 13054_2022_4290_MOESM1_ESM.pdf [file 13054_2022_4290_MOESM1_ESM.pdf]

## Sequential Organ Failure Assessment (SOFA) Score – Has the Time Come For an Update?

Moreno et al

### Electronic supplementary material

**Table S1.** Lookup table for imputed PaO<sub>2</sub> for a given SpO<sub>2</sub> based on non-linear equation (modified from [1])

| Measured SpO <sub>2</sub> (%) | Imputed PaO <sub>2</sub> (mmHg) |
|-------------------------------|---------------------------------|
| 100*                          | 167**                           |
| 99*                           | 132*                            |
| 98*                           | 104*                            |
| 97*                           | 91*                             |
| 96                            | 82                              |
| 95                            | 76                              |
| 94                            | 71                              |
| 93                            | 67                              |
| 92                            | 64                              |
| 91                            | 61                              |
| 90                            | 59                              |
| 89                            | 57                              |
| 88                            | 55                              |
| 87                            | 53                              |
| 86                            | 51                              |
| 85                            | 50                              |
| 84                            | 49                              |
| 83                            | 47                              |
| 82                            | 46                              |
| 81                            | 45                              |
| 80                            | 44                              |
| 79                            | 43                              |
| 78                            | 42                              |
| 77                            | 42                              |
| 76                            | 41                              |
| 75                            | 40                              |
| 74                            | 39                              |
| 73                            | 39                              |
| 72                            | 38                              |
| 71                            | 37                              |
| 70                            | 37                              |

\*Generally considered unreliable on the basis of the sigmoidal shape of the hemoglobin-oxygen dissociation curve  
\*\*Based on SpO<sub>2</sub> 99.5%.

#### Reference

1. Brown SM, Duggal A, Hou PC, Tidswell M, Khan A, Exline M et al. Nonlinear imputation of PaO<sub>2</sub>/FIO<sub>2</sub> from SpO<sub>2</sub>/FIO<sub>2</sub> among mechanically ventilated patients in the ICU: A prospective, observational study. Crit Care Med. 2017;45:1317-24
